# Supplementary material
Source: MDPI journal article supplement (https://www.mdpi.com/2071-1050/15/13/10658)
Supplement: s1 [file s1]

Valuation Subject: ...

...

QR Code Scan for detailed information about the criteria.

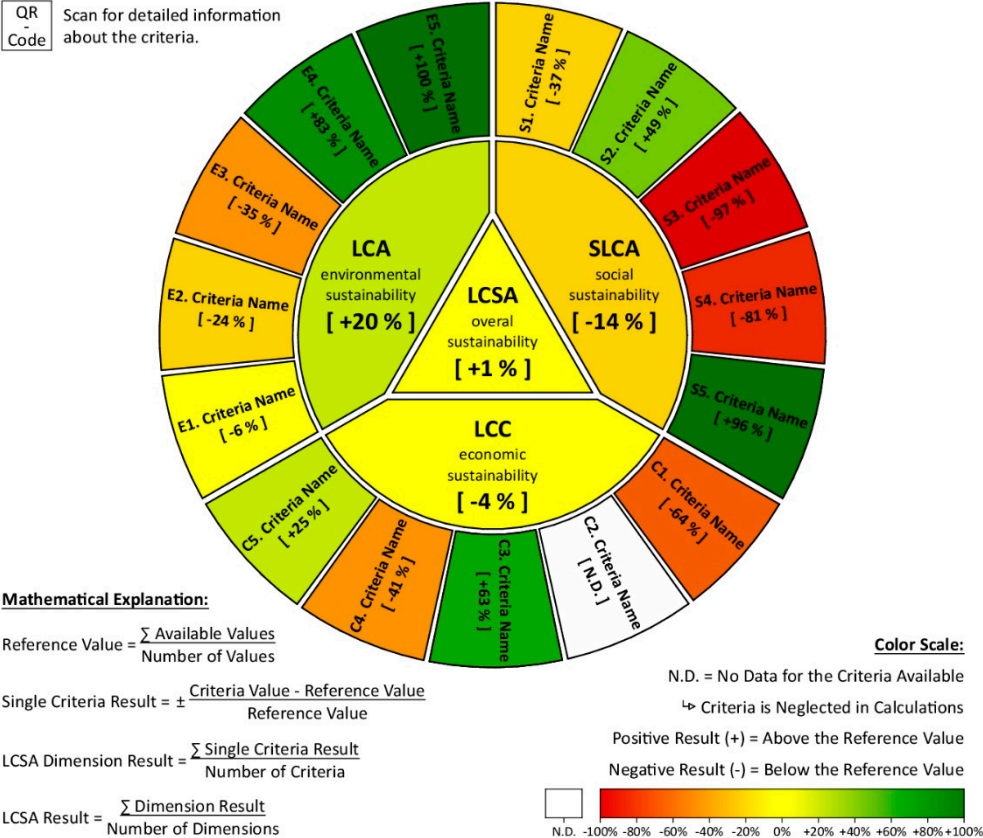

Criteria Description:

| LCA (Life Cycle Assessment): |             |            |        | LCC (Life Cycle Costing): |             |            |        | SLCA (Social Life Cycle Assessment): |             |            |        |
|------------------------------|-------------|------------|--------|---------------------------|-------------|------------|--------|--------------------------------------|-------------|------------|--------|
| Crit.                        | Total Value | Best Value | Source | Crit.                     | Total Value | Best Value | Source | Crit.                                | Total Value | Best Value | Source |
| E1                           |             |            |        | C1                        |             |            |        | S1                                   |             |            |        |
| E2                           |             |            |        | C2                        |             |            |        | S2                                   |             |            |        |
| E3                           |             |            |        | C3                        |             |            |        | S3                                   |             |            |        |
| E4                           |             |            |        | C4                        |             |            |        | S4                                   |             |            |        |
| E5                           |             |            |        | C5                        |             |            |        | S5                                   |             |            |        |
| E6                           |             |            |        | C6                        |             |            |        | S6                                   |             |            |        |
| E7                           |             |            |        | C7                        |             |            |        | S7                                   |             |            |        |
| E8                           |             |            |        | C8                        |             |            |        | S8                                   |             |            |        |
| E9                           |             |            |        | C9                        |             |            |        | S9                                   |             |            |        |
| E10                          |             |            |        | C10                       |             |            |        | S10                                  |             |            |        |
| E11                          |             |            |        | C11                       |             |            |        | S11                                  |             |            |        |
| E12                          |             |            |        | C12                       |             |            |        | S12                                  |             |            |        |
| E13                          |             |            |        | C13                       |             |            |        | S13                                  |             |            |        |
| E14                          |             |            |        | C14                       |             |            |        | S14                                  |             |            |        |
| E15                          |             |            |        | C15                       |             |            |        | S15                                  |             |            |        |
| E16                          |             |            |        | C16                       |             |            |        | S16                                  |             |            |        |
| E17                          |             |            |        | C17                       |             |            |        | S17                                  |             |            |        |
| E18                          |             |            |        | C18                       |             |            |        | S18                                  |             |            |        |
| E19                          |             |            |        | C19                       |             |            |        | S19                                  |             |            |        |
| E20                          |             |            |        | C20                       |             |            |        | S20                                  |             |            |        |

Figure S1. Future Development LCSA-Visualization: LCSA-Wheel - detailed version.

Valuation Subject: ...

## ARCHICAD STUDENTEN-VERSION

...

QR Code Scan for detailed information about the criteria.

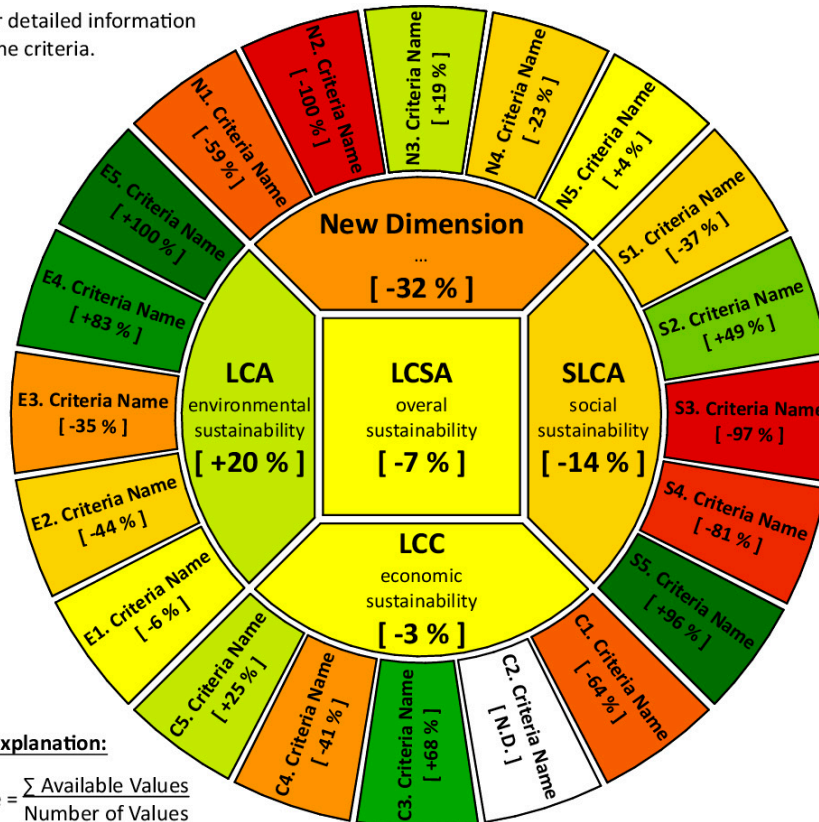

### Mathematical Explanation:

$$\text{Reference Value} = \frac{\sum \text{Available Values}}{\text{Number of Values}}$$

$$\text{Single Criteria Result} = \pm \frac{\text{Criteria Value} - \text{Reference Value}}{\text{Reference Value}}$$

$$\text{LCSA Dimension Result} = \frac{\sum \text{Single Criteria Result}}{\text{Number of Criteria}}$$

$$\text{LCSA Result} = \frac{\sum \text{Dimension Result}}{\text{Number of Dimensions}}$$

### Color Scale:

N.D. = No Data for the Criteria Available

↳ Criteria is Neglected in Calculations

Positive Result (+) = Above the Reference Value

Negative Result (-) = Below the Reference Value

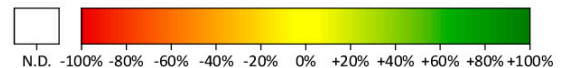

**Figure S2.** Future Development LCSA-Visualization: LCSA-Wheel - additional dimension.

Valuation Subject: ...

## ARCHICAD STUDENTEN-VERSION

...

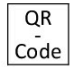

Scan for detailed information about the criteria.

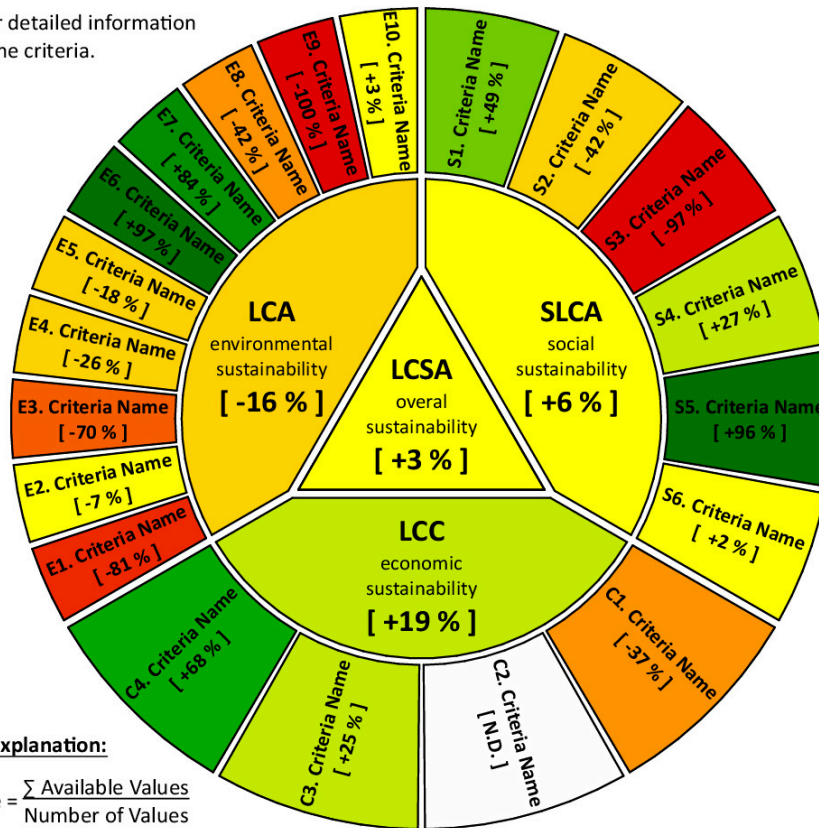

### Mathematical Explanation:

$$\text{Reference Value} = \frac{\sum \text{Available Values}}{\text{Number of Values}}$$

$$\text{Single Criteria Result} = \pm \frac{\text{Criteria Value} - \text{Reference Value}}{\text{Reference Value}}$$

$$\text{LCSA Dimension Result} = \frac{\sum \text{Single Criteria Result}}{\text{Number of Criteria}}$$

$$\text{LCSA Result} = \frac{\sum \text{Dimension Result}}{\text{Number of Dimensions}}$$

### Color Scale:

N.D. = No Data for the Criteria Available

↳ Criteria is Neglected in Calculations

Positive Result (+) = Above the Reference Value

Negative Result (-) = Below the Reference Value



**Figure S3.** Future Development LCSA-Visualization: LCSA-Wheel - additional criteria.
